# Supplementary material for: Cyanobacterial bloom significantly boosts hypolimnelic anammox bacterial abundance in a subtropical stratified reservoir
Source: Oxford University Press journal article supplement (doi:10.1093/femsec/fix118), 2017-09-11
Supplement: fix118_Supp.pdf [file fix118_Supp.pdf]

## Supplementary Information

### **Cyanobacterial bloom significantly boosts hypolimnetic anammox bacterial abundance in a subtropical stratified reservoir**

Yuanyuan Xue<sup>1,2,3</sup>, Zheng Yu<sup>1,4</sup>, Huihuang Chen<sup>1</sup>, Jun R. Yang<sup>1,2</sup>, Min Liu<sup>1,2,3</sup>, Lemian Liu<sup>1</sup>, Bangqing Huang<sup>3</sup> and Jun Yang<sup>1,\*</sup>

<sup>1</sup>Aquatic EcoHealth Group, Key Laboratory of Urban Environment and Health, Institute of Urban Environment, Chinese Academy of Sciences, Xiamen, 361021, China; <sup>2</sup>University of Chinese Academy of Sciences, Beijing, 100049, China; <sup>3</sup>College of the Environment and Ecology, Xiamen University, Xiamen, 361102, China; and <sup>4</sup>Department of Chemical Engineering, University of Washington, Seattle, 98195, WA, USA

**\*Correspondence:** Jun Yang, Institute of Urban Environment, Chinese Academy of Sciences, 1799 Jimei Road, Xiamen, 361021, China. Tel.: +86-592-6190775; Fax: +86-592-6190775; E-mail: [jyang@iue.ac.cn](mailto:jyang@iue.ac.cn)

Number of Pages: 9

Number of Figures: 3

Number of Tables: 5

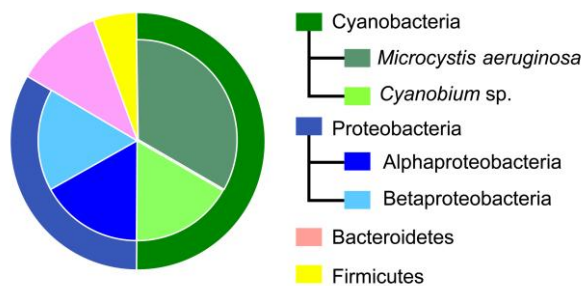

**Figure S1.** The relative abundance of bacterial 16S rRNA gene sequences showing the dominance of *Microcystis aeruginosa* in surface waters of the Xidong Reservoir during cyanobacterial bloom (day 297). At 97% sequence similarity level, the bacterial sequences were mostly affiliated to *Microcystis aeruginosa* (33.3%, 2 OTUs). One representative sequence for each OTU affiliated to *Microcystis aeruginosa* was stored in GenBank under accession numbers KY285028 and KY285029.

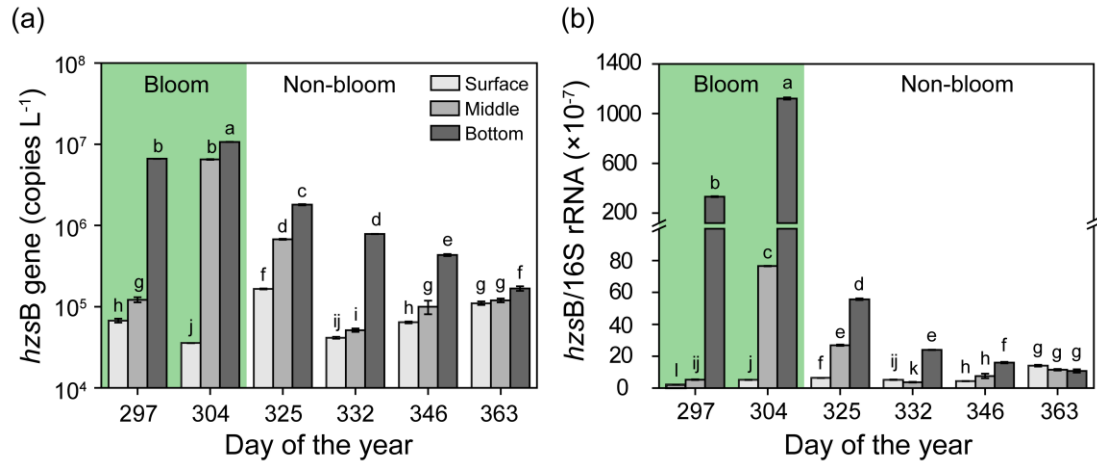

**Figure S2.** Patterns of *hzsB* gene abundance of anammox bacteria (a) and ratio of anammox bacteria to total bacteria (b) over space and time. Data are shown as means  $\pm$  standard error ( $n = 3$ ). Different letters represent significant differences among samples at  $P < 0.05$  level (one-way ANOVA).

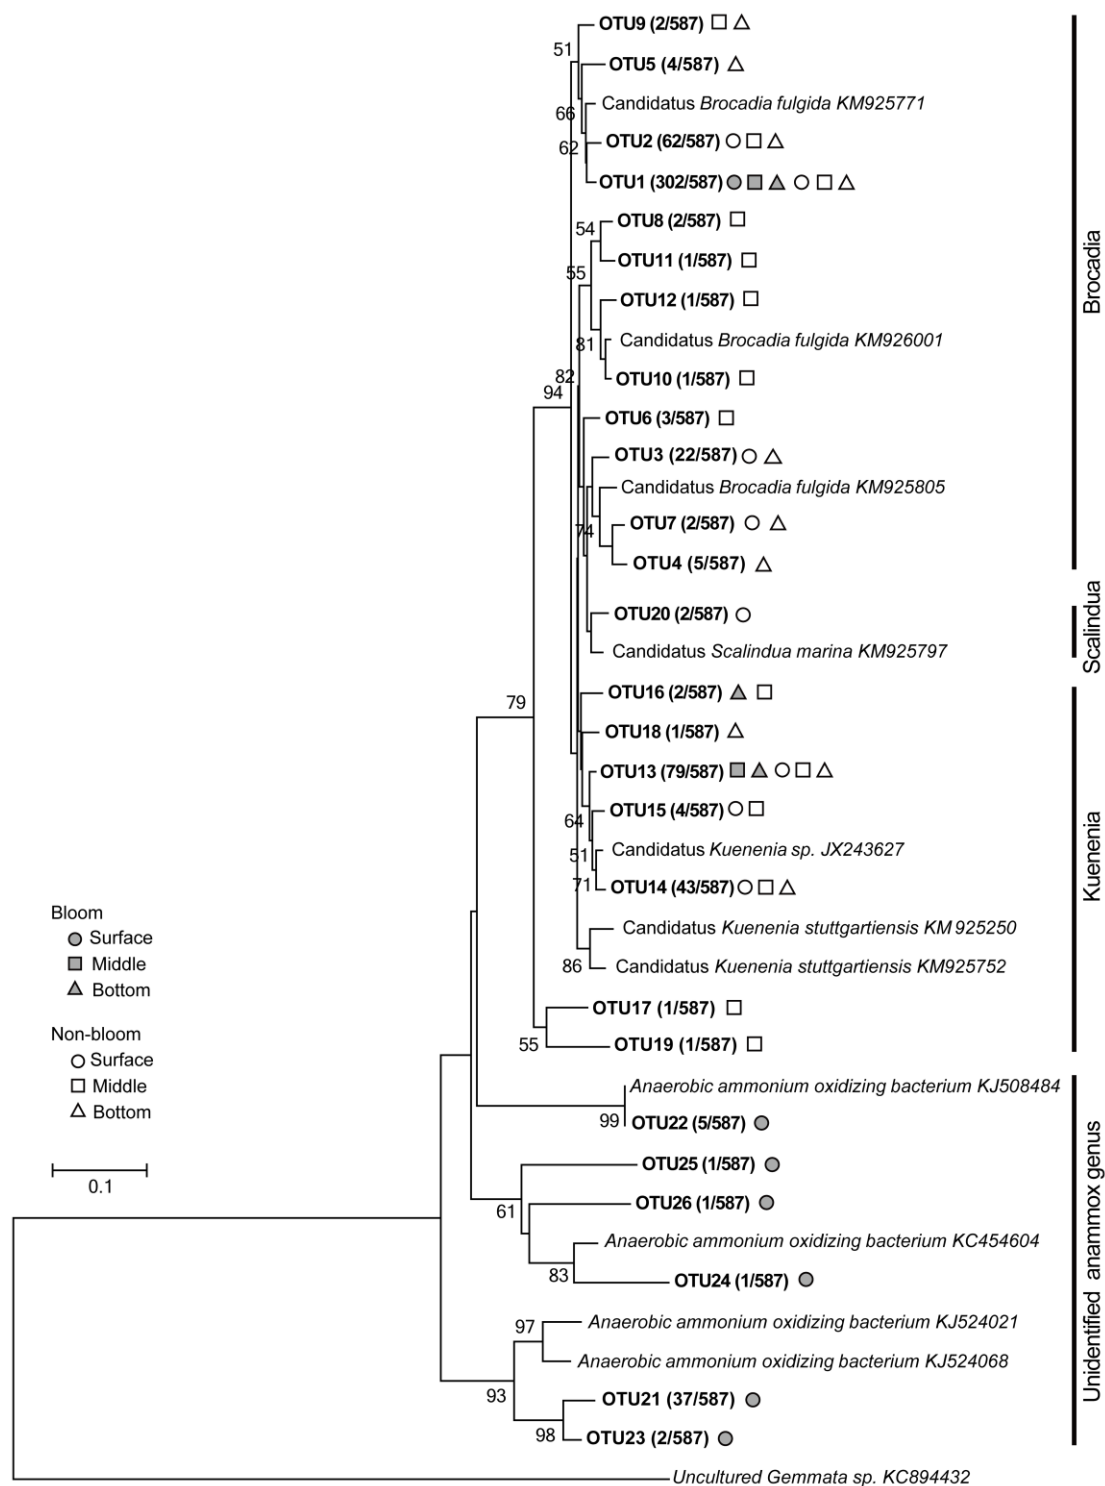

**Figure S3.** Neighbor-joining tree of phylogenetic analysis of the anammox bacterial 16S rRNA gene sequences using Kimura two-parameter distance in the MEGA 6.0 package. Sequences of the reference known anammox bacteria are indicated in italics, followed by accession numbers. The sequences obtained in the present study are indicated in boldface and are identified by “OTU” followed by a number. The number in parentheses represents the number of sequences in each OTU and the total number of sequences. Bootstrap values (%) were generated from 1000 replicates, and values of > 50% are shown.

**Table S1.** Phytoplankton parameters for the Xidong Reservoir from 24 October 2014 (day 297) to 29 December 2014 (day 363).

| Sample ID | Depth (m) | Date (d/m/y) | Day of year | Fv/Fm                       |      |      | Yield |      |      | Chlorophyll <i>a</i> ( $\mu\text{g L}^{-1}$ ) |      |       |       | IK<br>(Semi-light saturation point) |         |        | TSIc |
|-----------|-----------|--------------|-------------|-----------------------------|------|------|-------|------|------|-----------------------------------------------|------|-------|-------|-------------------------------------|---------|--------|------|
|           |           |              |             | (Photosynthesis efficiency) |      |      | Bl    | Gr   | Br   | Bl                                            | Gr   | Br    | Total | Bl                                  | Gr      | Br     |      |
|           |           |              |             | Bl                          | Gr   | Br   |       |      |      |                                               |      |       |       |                                     |         |        |      |
| 297S      | 0.5       | 24/10/14     | 297         | 0.23                        | 0.00 | 0.32 | 0.27  | 0.00 | 0.20 | 36.81                                         | 0.00 | 12.60 | 46.28 | 541.47                              | 0.00    | 399.43 | 62.2 |
| 297M      | 12        | 24/10/14     | 297         | 0.36                        | 0.00 | 0.46 | 0.34  | 0.00 | 0.31 | 20.02                                         | 0.00 | 7.64  | 26.54 | 727.30                              | 0.00    | 503.23 | -    |
| 297B      | 25        | 24/10/14     | 297         | 0.20                        | 0.00 | 0.30 | 0.24  | 0.00 | 0.23 | 19.74                                         | 0.00 | 7.25  | 25.54 | 503.20                              | 0.00    | 582.80 | -    |
| 304S      | 0.5       | 31/10/14     | 304         | 0.00                        | 0.00 | 0.20 | 0.00  | 0.00 | 0.12 | 27.83                                         | 0.00 | 5.41  | 29.58 | 1316.37                             | 0.00    | 510.07 | 61.3 |
| 304M      | 14        | 31/10/14     | 304         | 0.03                        | 0.00 | 0.29 | 0.05  | 0.00 | 0.14 | 15.38                                         | 0.00 | 3.70  | 17.33 | 1805.87                             | 0.00    | 525.27 | -    |
| 304B      | 25        | 31/10/14     | 304         | 0.02                        | 0.00 | 0.19 | 0.02  | 0.00 | 0.09 | 8.26                                          | 0.00 | 3.91  | 11.88 | 641.60                              | 0.00    | 825.30 | -    |
| 325S      | 0.5       | 21/11/14     | 325         | 0.00                        | 0.57 | 0.38 | 0.00  | 0.39 | 0.26 | 0.25                                          | 4.13 | 1.77  | 6.69  | 4828.03                             | 521.57  | 461.90 | 48.6 |
| 325M      | 17        | 21/11/14     | 325         | 0.00                        | 0.63 | 0.54 | 0.00  | 0.39 | 0.39 | 0.32                                          | 3.79 | 2.21  | 6.99  | 3456.13                             | 568.90  | 604.43 | -    |
| 325B      | 25        | 21/11/14     | 325         | 0.00                        | 0.53 | 0.31 | 0.00  | 0.31 | 0.27 | 0.13                                          | 3.60 | 1.49  | 5.69  | 959.83                              | 544.77  | 703.53 | -    |
| 332S      | 0.5       | 28/11/14     | 332         | 0.00                        | 0.68 | 0.55 | 0.26  | 0.00 | 0.43 | 0.79                                          | 1.02 | 9.92  | 14.87 | 889.13                              | 31.03   | 811.67 | 52.4 |
| 332M      | 17        | 28/11/14     | 332         | 0.00                        | 0.50 | 0.52 | 0.00  | 0.31 | 0.40 | 0.25                                          | 1.90 | 4.22  | 7.72  | 0.00                                | 1347.70 | 664.97 | -    |
| 332B      | 25        | 28/11/14     | 332         | 0.00                        | 0.75 | 0.42 | 0.23  | 0.46 | 0.33 | 0.53                                          | 0.68 | 4.19  | 6.69  | 681.57                              | 1927.30 | 770.53 | -    |
| 346S      | 0.5       | 12/12/14     | 346         | 0.00                        | 0.77 | 0.39 | 0.00  | 0.52 | 0.27 | 0.42                                          | 0.64 | 4.92  | 7.53  | 774.83                              | 831.37  | 507.03 | 51.5 |
| 346M      | 20        | 12/12/14     | 346         | 0.00                        | 0.00 | 0.49 | 0.00  | 0.54 | 0.32 | 0.46                                          | 0.00 | 4.84  | 6.80  | 783.33                              | 1645.40 | 567.93 | -    |
| 346B      | 25        | 12/12/14     | 346         | 0.00                        | 0.44 | 0.33 | 0.00  | 0.31 | 0.27 | 0.00                                          | 1.88 | 2.71  | 5.53  | 0.00                                | 2004.27 | 549.53 | -    |
| 363S      | 0.5       | 29/12/14     | 363         | 0.00                        | 0.62 | 0.36 | 0.00  | 0.33 | 0.28 | 0.36                                          | 2.49 | 2.55  | 6.18  | 3617.57                             | 471.43  | 642.50 | 46.1 |
| 363M      | 18        | 29/12/14     | 363         | 0.00                        | 0.60 | 0.47 | 0.00  | 0.34 | 0.41 | 0.23                                          | 2.39 | 2.98  | 6.54  | 2248.00                             | 545.40  | 604.10 | -    |
| 363B      | 25        | 29/12/14     | 363         | 0.00                        | 0.66 | 0.49 | 0.00  | 0.32 | 0.35 | 0.25                                          | 2.30 | 2.99  | 6.49  | 2504.30                             | 541.33  | 572.00 | -    |

Dark grey background denotes sampling dates during cyanobacterial bloom. Light grey background denotes sampling dates during non-bloom period. White background denotes water mixing and non-bloom period. The letters S, M and B represent surface, middle and bottom waters, respectively. The letters Bl, Gr and Br represent cyanobacteria, green algae and diatoms/dinoflagellates, respectively. TSIc denotes comprehensive trophic state index.

**Table S2.** Phylogenetic affiliations of anammox bacterial 16S rRNA gene sequences revealed by cloning sequence.

| OTU <sub>0.03</sub><br>(clone number) | Best match sequences<br>from GeneBank | Similarity<br>(%) | Accession<br>number | Source                                      |
|---------------------------------------|---------------------------------------|-------------------|---------------------|---------------------------------------------|
| OTU1(302)                             | <i>Ca. Brocadia fulgida</i>           | 98                | KM 925771           | Coastal sediment of China                   |
| OTU2 (62)                             | <i>Ca. Brocadia fulgida</i>           | 98                | KM 925771           | Coastal sediment of China                   |
| OTU3 (22)                             | <i>Ca. Brocadia fulgida</i>           | 97                | KM 925805           | Coastal sediment of China                   |
| OTU4 (5)                              | <i>Ca. Brocadia fulgida</i>           | 95                | KM 925805           | Coastal sediment of China                   |
| OTU5 (4)                              | <i>Ca. Brocadia fulgida</i>           | 98                | KM 925771           | Coastal sediment of China                   |
| OTU6 (3)                              | <i>Ca. Brocadia fulgida</i>           | 98                | JX 243636           | Marsh sediment of the Yangtze estuary       |
| OTU7 (2)                              | <i>Ca. Brocadia fulgida</i>           | 97                | KM 925805           | Coastal sediment of China                   |
| OTU8 (2)                              | <i>Ca. Brocadia fulgida</i>           | 97                | KM 926001           | Coastal sediment of China                   |
| OTU9 (2)                              | <i>Ca. Brocadia fulgida</i>           | 96                | KM 925771           | Coastal sediment of China                   |
| OTU10 (1)                             | <i>Ca. Brocadia fulgida</i>           | 99                | KM 926001           | Coastal sediment of China                   |
| OTU11 (1)                             | <i>Ca. Brocadia fulgida</i>           | 97                | KM 926001           | Coastal sediment of China                   |
| OTU12 (1)                             | <i>Ca. Brocadia fulgida</i>           | 95                | KM 926001           | Coastal sediment of China                   |
| OTU13 (79)                            | <i>Ca. Kuenenia stuttgartiensis</i>   | 94                | KM 925752           | Coastal sediment of China                   |
| OTU14 (43)                            | <i>Ca. Kuenenia stuttgartiensis</i>   | 95                | KM 925250           | Coastal sediment of China                   |
| OTU15 (4)                             | <i>Ca. Kuenenia stuttgartiensis</i>   | 94                | KM 925250           | Coastal sediment of China                   |
| OTU16 (2)                             | <i>Ca. Kuenenia stuttgartiensis</i>   | 94                | KM 925752           | Coastal sediment of China                   |
| OTU17 (1)                             | <i>Ca. Kuenenia stuttgartiensis</i>   | 97                | KM 925752           | Coastal sediment of China                   |
| OTU18 (1)                             | <i>Ca. Kuenenia stuttgartiensis</i>   | 94                | KM 925752           | Coastal sediment of China                   |
| OTU19 (1)                             | <i>Ca. Kuenenia sp.</i>               | 98                | JX 243627           | Marsh sediment of the Yangtze estuary       |
| OTU20 (2)                             | <i>Ca. Scalindua marina</i>           | 96                | KM 925797           | Coastal sediment of China                   |
| OTU21 (37)                            | Uncultured anammox bacteria           | 88                | KJ 524021           | Rice rhizosphere                            |
| OTU22 (5)                             | Uncultured anammox bacteria           | 100               | KJ 508484           | Paddy soil                                  |
| OTU23 (2)                             | Uncultured anammox bacteria           | 90                | KJ 524068           | Rice rhizosphere                            |
| OTU24 (1)                             | Uncultured anammox bacteria           | 89                | KC 454604           | Terrestrial aquatic ecosystem               |
| OTU25 (1)                             | Uncultured anammox bacteria           | 85                | KC 454604           | Terrestrial aquatic ecosystem               |
| OTU26 (1)                             | Uncultured anammox bacteria           | 85                | KC 454604           | Terrestrial aquatic ecosystem               |
| OTU27 (2)                             | Uncultured Planctomycete              | 97                | JQ 958789           | Cyanobacterial aggregates in eutrophic lake |
| OTU28 (1)                             | Uncultured Planctomycete              | 98                | KM 095339           | Rhizosphere sediment                        |
| OTU29 (1)                             | Uncultured Planctomycete              | 93                | HQ 162757           | Sediment                                    |
| OTU30 (1)                             | Uncultured Planctomycete              | 91                | HQ 162757           | Sediment                                    |
| OTU31 (1)                             | Uncultured Planctomycete              | 89                | JQ 701675           | Water sample                                |
| OTU32 (1)                             | Uncultured Planctomycete              | 88                | JN 003005           | Water-rock interactions area                |
| OTU33 (1)                             | Planctomycete bacteria                | 90                | JF 488158           | Surface water sample                        |
| OTU34 (6)                             | Uncultured bacteria                   | 88                | AB 656421           | Paddy soil                                  |
| OTU35 (1)                             | Uncultured bacteria                   | 90                | AB 656421           | Paddy soil                                  |
| OTU36 (1)                             | Uncultured bacteria                   | 96                | FJ 447723           | Mesotrophic lake                            |

Note: For analysis of anammox bacterial community and diversity, unidentified bacteria from OTU27 to OTU36 (i.e. Planctomycete and uncultured bacteria) were excluded in this study.

**Table S3.** Physicochemical parameters for the Xidong Reservoir from 24 October 2014 (day 297) to 29 December 2014 (day 363).

| Sample ID | Depth (m) | Date (m/d/y) | Day of year | Temperature (°C) | EC ( $\mu\text{S cm}^{-1}$ ) | Turbidity (NTU) | pH   | ORP (mV) | DO   | TC    | TOC   | TN    | Nutrients ( $\text{mg L}^{-1}$ ) |                    |                    |       |                    | TN:TP | Transparency (m) |
|-----------|-----------|--------------|-------------|------------------|------------------------------|-----------------|------|----------|------|-------|-------|-------|----------------------------------|--------------------|--------------------|-------|--------------------|-------|------------------|
|           |           |              |             |                  |                              |                 |      |          |      |       |       |       | NH <sub>4</sub> -N               | NO <sub>3</sub> -N | NO <sub>2</sub> -N | TP    | PO <sub>4</sub> -P |       |                  |
| 297S      | 0.5       | 24/10/14     | 297         | 25.52            | 24.9                         | 19.5            | 8.06 | 170      | 7.01 | 6.631 | 3.513 | 0.779 | 0.020                            | 0.209              | 0.002              | 0.022 | 0.002              | 35.45 | 1.09             |
| 297M      | 12        | 24/10/14     | 297         | 25.23            | 24.2                         | 4.3             | 7.34 | 277      | 3.55 | 5.639 | 2.573 | 0.641 | 0.015                            | 0.202              | 0.002              | 0.018 | 0.002              | 35.56 | -                |
| 297B      | 25        | 24/10/14     | 297         | 17.13            | 81.9                         | 6.1             | 7.57 | 29       | 0.00 | 5.637 | 1.460 | 0.995 | 0.519                            | 0.200              | 0.004              | 0.048 | 0.017              | 20.83 | -                |
| 304S      | 0.5       | 31/10/14     | 304         | 25.19            | 26.2                         | 34.4            | 7.86 | 385      | 7.40 | 6.546 | 3.472 | 0.872 | 0.083                            | 0.239              | 0.001              | 0.032 | 0.006              | 27.19 | 0.95             |
| 304M      | 14        | 31/10/14     | 304         | 23.80            | 20.9                         | 4.6             | 7.00 | 410      | 1.57 | 5.621 | 2.365 | 0.656 | 0.056                            | 0.239              | 0.001              | 0.026 | 0.004              | 25.38 | -                |
| 304B      | 25        | 31/10/14     | 304         | 17.18            | 82.0                         | 5.5             | 7.57 | 42       | 0.00 | 5.841 | 0.796 | 1.257 | 0.838                            | 0.114              | 0.004              | 0.069 | 0.039              | 18.26 | -                |
| 325S      | 0.5       | 21/11/14     | 325         | 22.04            | 25.9                         | 5.0             | 6.47 | 548      | 5.22 | 4.224 | 0.951 | 0.738 | 0.196                            | 0.275              | 0.019              | 0.024 | 0.002              | 30.83 | 2.50             |
| 325M      | 17        | 21/11/14     | 325         | 21.55            | 29.2                         | 14.6            | 6.07 | 563      | 1.10 | 4.229 | 0.758 | 0.697 | 0.212                            | 0.224              | 0.018              | 0.024 | 0.004              | 29.17 | -                |
| 325B      | 25        | 21/11/14     | 325         | 17.20            | 88.2                         | 5.4             | 6.53 | 49       | 0.00 | 5.434 | 0.493 | 1.272 | 0.865                            | 0.211              | 0.014              | 0.071 | 0.028              | 17.89 | -                |
| 332S      | 0.5       | 28/11/14     | 332         | 22.46            | 26.8                         | 3.5             | 6.82 | 275      | 8.27 | 4.245 | 1.082 | 0.707 | 0.053                            | 0.318              | 0.006              | 0.028 | 0.002              | 25.36 | 3.00             |
| 332M      | 17        | 28/11/14     | 332         | 21.46            | 29.6                         | 7.8             | 5.97 | 326      | 0.50 | 4.311 | 0.823 | 0.748 | 0.267                            | 0.245              | 0.002              | 0.020 | 0.004              | 37.50 | -                |
| 332B      | 25        | 28/11/14     | 332         | 17.22            | 99.3                         | 5.4             | 6.53 | 85       | 0.00 | 4.599 | 0.399 | 1.098 | 0.772                            | 0.008              | 0.005              | 0.048 | 0.030              | 22.92 | -                |
| 346S      | 0.5       | 12/12/14     | 346         | 19.79            | 29.0                         | 6.4             | 6.19 | 483      | 6.33 | 4.078 | 0.713 | 0.810 | 0.218                            | 0.284              | 0.001              | 0.024 | 0.004              | 33.75 | 1.48             |
| 346M      | 20        | 12/12/14     | 346         | 19.62            | 30.6                         | 24.0            | 6.21 | 460      | 1.86 | 3.958 | 0.429 | 0.913 | 0.245                            | 0.275              | 0.000              | 0.020 | 0.002              | 45.50 | -                |
| 346B      | 25        | 12/12/14     | 346         | 17.23            | 110.6                        | 8.0             | 6.79 | 67       | 0.00 | 4.907 | 0.378 | 1.282 | 0.777                            | 0.155              | 0.004              | 0.059 | 0.022              | 21.69 | -                |
| 363S      | 0.5       | 29/12/14     | 363         | 16.88            | 26.6                         | 4.7             | 6.27 | 413      | 8.22 | 3.743 | 0.563 | 0.697 | 0.174                            | 0.318              | 0.018              | 0.016 | 0.004              | 43.75 | 3.27             |
| 363M      | 18        | 29/12/14     | 363         | 16.81            | 25.9                         | 4.8             | 6.59 | 403      | 8.18 | 3.625 | 0.368 | 0.677 | 0.190                            | 0.318              | 0.018              | 0.016 | 0.004              | 42.50 | -                |
| 363B      | 25        | 29/12/14     | 363         | 16.80            | 26.3                         | 5.1             | 6.60 | 403      | 8.17 | 3.579 | 0.293 | 0.697 | 0.174                            | 0.318              | 0.018              | 0.016 | 0.002              | 43.75 | -                |

Dark grey background denotes sampling dates during cyanobacterial bloom. Light grey background denotes sampling dates during non-bloom period. White background denotes water mixing and non-bloom period. The letters S, M and B represent surface, middle and bottom waters, respectively. EC, electrical conductivity; ORP, oxidation reduction potential; DO, dissolved oxygen; TC, total carbon; TOC, total organic carbon; TN, total nitrogen; NH<sub>4</sub>-N, ammonium nitrogen; NO<sub>3</sub>-N, nitrate nitrogen; NO<sub>2</sub>-N, nitrite nitrogen; TP, total phosphorous; PO<sub>4</sub>-P, phosphate phosphorus.

**Table S4.** Comparisons of anammox bacterial *hzsB* gene abundance and *hzsB* gene/bacterial 16S rRNA gene ratio across depth and time.

|                                 |                                                   | <i>hzsB</i> gene | <i>hzsB</i> /16S rRNA |
|---------------------------------|---------------------------------------------------|------------------|-----------------------|
|                                 |                                                   | <i>P</i> -value  | <i>P</i> -value       |
| <i>Bloom stratification</i>     |                                                   |                  |                       |
|                                 | Surface vs. Middle                                | <b>0.002</b>     | <b>0.015</b>          |
|                                 | Surface vs. Bottom                                | <b>0.002</b>     | <b>0.002</b>          |
|                                 | Middle vs. Bottom                                 | <b>0.002</b>     | <b>0.002</b>          |
| <i>Non-bloom stratification</i> |                                                   |                  |                       |
| Depth                           | Surface vs. Middle                                | 0.258            | 0.387                 |
|                                 | Surface vs. Bottom                                | <b>0.000</b>     | <b>0.000</b>          |
|                                 | Middle vs. Bottom                                 | <b>0.004</b>     | <b>0.050</b>          |
| <i>Non-bloom mixing</i>         |                                                   |                  |                       |
|                                 | Surface vs. Middle                                | 0.400            | 0.100                 |
|                                 | Surface vs. Bottom                                | 0.100            | 0.100                 |
|                                 | Middle vs. Bottom                                 | 0.100            | 0.700                 |
| <i>Surface</i>                  |                                                   |                  |                       |
|                                 | Bloom stratification vs. Non-bloom stratification | 0.181            | 0.113                 |
|                                 | Bloom stratification vs. Non-bloom mixing         | <b>0.024</b>     | <b>0.024</b>          |
|                                 | Non-bloom stratification vs. Non-bloom mixing     | 0.482            | <b>0.009</b>          |
| <i>Middle</i>                   |                                                   |                  |                       |
| Time                            | Bloom stratification vs. Non-bloom stratification | 0.066            | 0.328                 |
|                                 | Bloom stratification vs. Non-bloom mixing         | 0.262            | 1.000                 |
|                                 | Non-bloom stratification vs. Non-bloom mixing     | 0.864            | 0.482                 |
| <i>Bottom</i>                   |                                                   |                  |                       |
|                                 | Bloom stratification vs. Non-bloom stratification | <b>0.000</b>     | <b>0.000</b>          |
|                                 | Bloom stratification vs. Non-bloom mixing         | <b>0.024</b>     | <b>0.024</b>          |
|                                 | Non-bloom stratification vs. Non-bloom mixing     | <b>0.009</b>     | <b>0.009</b>          |

Boldface indicates the *P*-values < 0.05. Statistical test is nonparametric Mann-Whitney *U* test.



**Table S5.** Spearman rank correlation between environmental factors and anammox bacteria.

| Environmental variables | OTUs   | Chao 1 | Shannon-Wiener | Simpson  | Pielou's evenness |
|-------------------------|--------|--------|----------------|----------|-------------------|
| Temperature             | 0.171  | 0.151  | -0.050         | -0.383   | -0.360            |
| Electrical conductivity | 0.068  | 0.084  | 0.400          | 0.600    | 0.209             |
| Turbidity               | 0.624  | 0.698* | 0.550          | 0.417    | -0.477            |
| pH                      | -0.222 | -0.134 | -0.317         | -0.483   | 0.050             |
| ORP                     | 0.333  | 0.202  | 0.267          | 0.100    | -0.293            |
| Dissolved oxygen        | 0.087  | 0.077  | -0.119         | -0.186   | -0.179            |
| Total carbon            | -0.305 | -0.165 | -0.494         | -0.695*  | -0.084            |
| Total organic carbon    | -0.171 | -0.126 | -0.617         | -0.917** | -0.285            |
| Total nitrogen          | -0.026 | 0.025  | 0.317          | 0.617    | 0.335             |
| Ammonium nitrogen       | -0.073 | -0.038 | 0.234          | 0.586    | 0.332             |
| Nitrate nitrogen        | 0.430  | 0.362  | 0.205          | 0.274    | -0.313            |
| Nitrite nitrogen        | 0.147  | 0.047  | 0.160          | -0.160   | -0.241            |
| Total phosphorous       | -0.165 | -0.154 | 0.153          | 0.356    | 0.272             |
| Phosphate phosphorus    | -0.350 | -0.275 | -0.017         | 0.315    | 0.395             |
| TN:TP                   | 0.222  | 0.202  | 0.033          | -0.067   | -0.176            |
| Chlorophyll <i>a</i>    | -0.248 | -0.143 | -0.667*        | -0.767*  | -0.167            |

\* $P < 0.05$ , \*\* $P < 0.01$ . ORP, Oxidation reduction potential.
